# Supplementary material for: Miyoshi Muscular Dystrophy Type 1 with Mutated DYSF Gene Misdiagnosed as Becker Muscular Dystrophy: A Case Report and Literature Review
Source: MDPI journal article supplement (doi:10.3390/genes14010200), 2023-01-12
Supplement: s1 [file s1]

**Supplementary Table S1. A list of 68 selected genes in a custom hereditary muscular dystrophy panel**

|               |                |               |               |                |               |                |
|---------------|----------------|---------------|---------------|----------------|---------------|----------------|
| <i>ACTA1</i>  | <i>ANO5</i>    | <i>ATP2A1</i> | <i>BAG3</i>   | <i>BIN1</i>    | <i>CAPN3</i>  | <i>CAV3</i>    |
| <i>CCDC78</i> | <i>CFL2</i>    | <i>CLCN1</i>  | <i>CNTN1</i>  | <i>COL6A1</i>  | <i>COL6A2</i> | <i>COL6A3</i>  |
| <i>CRYAB</i>  | <i>DAG1</i>    | <i>DES</i>    | <i>DMD</i>    | <i>DNAJB6</i>  | <i>DOK7</i>   | <i>DYNC1H1</i> |
| <i>DYSF</i>   | <i>EMD</i>     | <i>FHL1</i>   | <i>FLNC</i>   | <i>FKRP</i>    | <i>FKTN</i>   | <i>GAA</i>     |
| <i>GNB</i>    | <i>IGHMBP2</i> | <i>ISPD</i>   | <i>ITGA7</i>  | <i>KBTBD13</i> | <i>KLHL40</i> | <i>KLHL41</i>  |
| <i>LAMA2</i>  | <i>LARGE</i>   | <i>LDB3</i>   | <i>LMNA</i>   | <i>MTM1</i>    | <i>MYH7</i>   | <i>MYOT</i>    |
| <i>NEB</i>    | <i>PABPN1</i>  | <i>PLEC</i>   | <i>POLG</i>   | <i>POMGNT1</i> | <i>POMT1</i>  | <i>POMT2</i>   |
| <i>RYR1</i>   | <i>SEPN1</i>   | <i>SGCA</i>   | <i>SGCB</i>   | <i>SGCD</i>    | <i>SGCE</i>   | <i>SGCG</i>    |
| <i>SYNE1</i>  | <i>SYNE2</i>   | <i>TCAP</i>   | <i>TNNT1</i>  | <i>TPM2</i>    | <i>TPM3</i>   | <i>TRIM32</i>  |
| <i>TRPV4</i>  | <i>TTN</i>     | <i>VCP</i>    | <i>VPS13A</i> | <i>VRK1</i>    |               |                |
